## Correction: Non-small-cell lung cancer and miRNAs: novel biomarkers and promising tools for treatment

Bing Feng, Kai Zhang, Rui Wang and Longbang Chen

Volume 128 (2015) pp 619–634

The first two authors, Bing Feng and Kai Zhang should have been indicated as having made an equal contribution of this work.

## Correction: Hypotensive and sympathoinhibitory responses to selective central AT<sub>2</sub> receptor stimulation in spontaneously hypertensive rats

Sofie Brouwers, Ilse Smolders, Richard D. Wainford and Alain G. Dupont

Volume 129 (2015) pp 81–92

Owing to an error introduced during the production process, the daytime saline control value for D21 SHR (+ 8.0 ± 0.8) in Table 2 has been omitted. The corrected version of Table 2 is presented here:

**Table 2** Change in mean arterial blood pressure (MAP; mmHg) in Wistar Kyoto rats (WKY) (above) and Spontaneously Hypertensive rats (SHRs) (below). Data are shown as mean ± SEM (n = 6–8 per group).

| <b>WKY</b> |                                |                   |            |                             |                   |
|------------|--------------------------------|-------------------|------------|-----------------------------|-------------------|
| <b>D14</b> | <b>C21 icv</b>                 | <b>Saline icv</b> |            |                             |                   |
| 24h        | − 6.8 ± 0.7 *                  | + 0.7 ± 0.1       |            |                             |                   |
| Night      | − 8.2 ± 0.8 **                 | + 0.8 ± 0.1       |            |                             |                   |
| Day        | − 5.5 ± 0.6 *                  | + 1.1 ± 0.2       |            |                             |                   |
| <b>SHR</b> |                                |                   |            |                             |                   |
| <b>D14</b> | <b>C21 icv</b>                 | <b>Saline icv</b> | <b>D21</b> | <b>C21 icv</b>              | <b>Saline icv</b> |
| 24h        | − 9.0 ± 1.7 <sup>#</sup>       | + 3.9 ± 1.1       | 24h        | − 18.0 ± 2.0 <sup>###</sup> | + 11.6 ± 2.1      |
| Night      | − 12.6 ± 1.9 <sup>#</sup> \$\$ | + 5.2 ± 0.4       | Night      | − 24.8 ± 2.2 <sup>###</sup> | + 14.6 ± 1.5      |
| Day        | − 5.4 ± 1.5 <sup>#</sup>       | + 3.8 ± 0.3       | Day        | − 11.3 ± 1.8 <sup>###</sup> | + 8.0 ± 0.8       |

D: day. \*P<0.05, \*\*P<0.01 vs WKY saline control, <sup>#</sup>P<0.05, <sup>###</sup>P<0.001 vs SHR saline control, <sup>\$\$</sup>P<0.01 vs WKY C21.

# Correction: Cellular and molecular actions of CCN2/CTGF and its role under physiological and pathological conditions

Satoshi Kubota and Masaharu Takigawa

Volume 128 (2015) pp 181–196

One of the authors was omitted as the corresponding author during the production process. The corresponding authors should be as follows:

Professor Satoshi Kubota (email [kubota1@md.okayama-u.ac.jp](mailto:kubota1@md.okayama-u.ac.jp))

Professor Masaharu Takigawa (email [takigawa@md.okayama-u.ac.jp](mailto:takigawa@md.okayama-u.ac.jp))
